# Supplementary material for: Facile synthesis of 3D nitrogen-doped graphene aerogel nanomeshes with hierarchical porous structures for applications in high-performance supercapacitors
Source: Royal Society of Chemistry journal article supplement (doi:10.1039/c7nj00440k), 2017-01-01
Supplement: c7nj00440k1.pdf [file c7nj00440k1.pdf]

# **Facile Synthesis of 3D Nitrogen-doped Graphene Aerogel Nanomesh with Hierarchical Porous Structures for Applications in High-performance Supercapacitors**

Xiao-Li Su<sup>a</sup>, Ming-Yu Cheng<sup>a</sup>, Lin Fu<sup>a</sup>, Guang-Ping Zheng<sup>b</sup>, Xiu-Cheng Zheng<sup>a,c\*</sup>, Jing-He  
Yang<sup>d\*</sup> and Xin-Xin Guan<sup>a,c</sup>

<sup>a</sup> College of Chemistry and Molecular Engineering, Zhengzhou University, Zhengzhou 450001,  
China

<sup>b</sup> Department of Mechanical Engineering, The Hong Kong Polytechnic University, Hong  
Kong, China

<sup>c</sup> Key Laboratory of Advanced Energy Materials Chemistry (Ministry of Education), Nankai  
University, Tianjin 300071, China

<sup>d</sup> School of Chemical Engineering and Energy, Zhengzhou University, Zhengzhou 450001, China

\*Corresponding author: E-mail address: zhxch@zzu.edu.cn (X.C. Zheng), jhyang@zzu.edu.cn  
(J.H. Yang)

This supporting information includes Fig. S1.

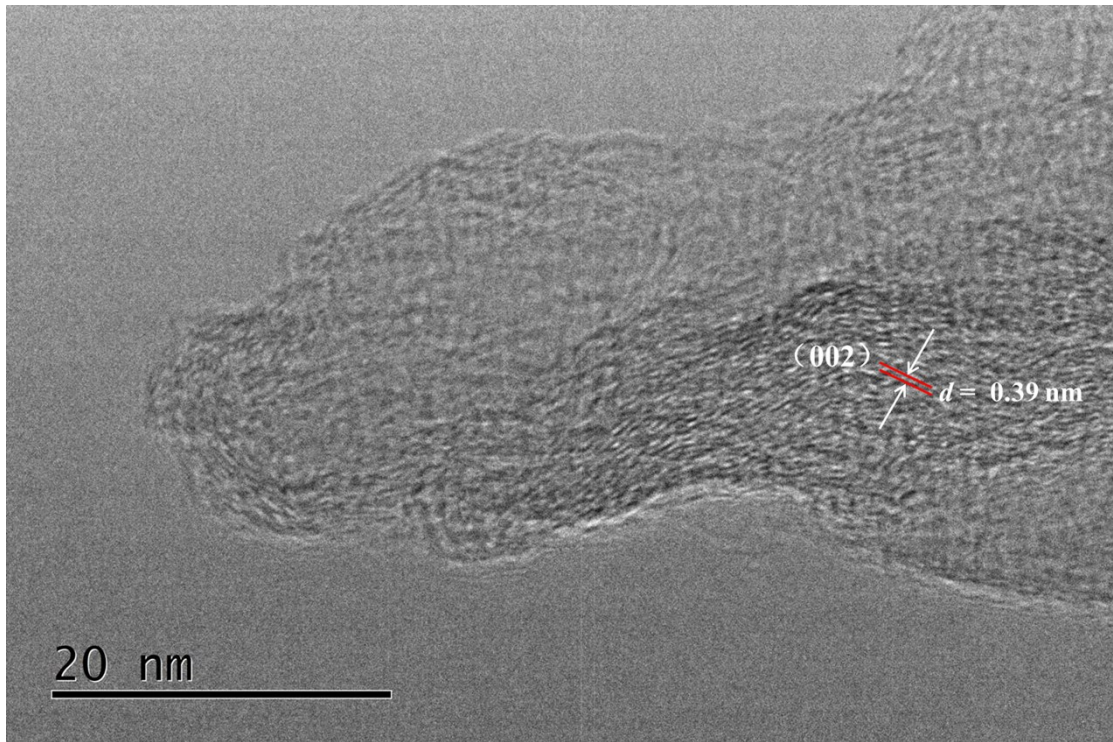

**Fig. S1** HRTEM image of the resulting N-GANM.
